# Supplementary material for: A clinical metabolomics-based biomarker signature as an approach for early diagnosis of gastric cardia adenocarcinoma
Source: PubMed Central journal article supplement — Oncol Lett. 2019 Dec 2;19(1):681–90. doi: 10.3892/ol.2019.11173 (PMC6924188; doi:10.3892/ol.2019.11173), 2019-12-02
Supplement: Supplementary_Data.pdf [file Supplementary_Data.pdf]

Figure S1. PCA for GCA (blue circles) and healthy controls (red triangles) using the metabolomics data. (A) PCA score plot in the positive ion modes. (B) PCA score plot in the negative ion modes. PCA, principal component analysis; GCA, gastric cardia adenocarcinoma.

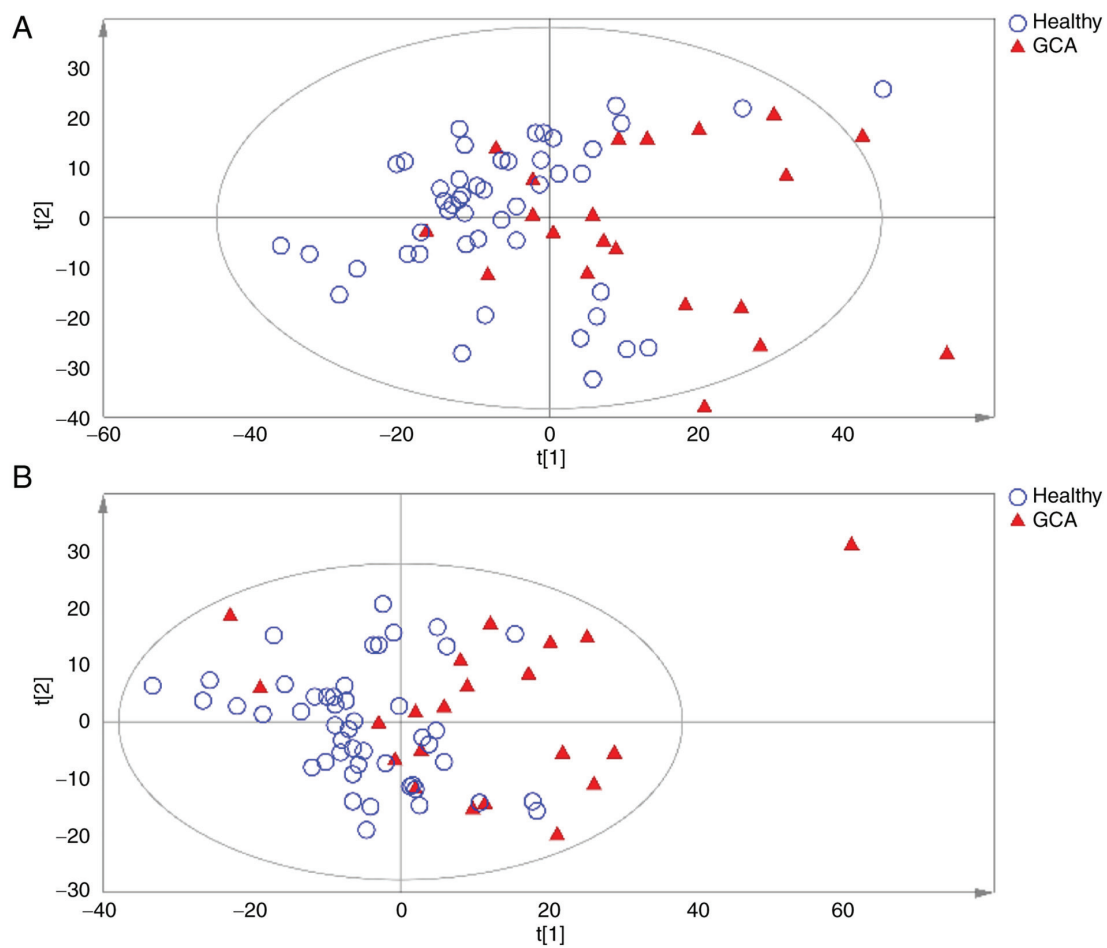

Table SI. Results of the precision analysis of the instrument (retention time).

| Peak name | Retention time, min |        |        |        |        |        | Mean, min | % RSD |
|-----------|---------------------|--------|--------|--------|--------|--------|-----------|-------|
|           | 1                   | 2      | 3      | 4      | 5      | 6      |           |       |
| S1        | 1.980               | 1.977  | 1.977  | 1.980  | 1.975  | 1.978  | 1.978     | 0.100 |
| S2        | 8.233               | 8.237  | 8.237  | 8.232  | 8.238  | 8.235  | 8.235     | 0.029 |
| S3        | 11.484              | 11.487 | 11.488 | 11.491 | 11.491 | 11.492 | 11.489    | 0.026 |
| S4        | 11.716              | 11.723 | 11.718 | 11.724 | 11.721 | 11.723 | 11.721    | 0.028 |
| S5        | 12.008              | 12.012 | 12.011 | 12.012 | 12.017 | 12.011 | 12.012    | 0.024 |
| S6        | 12.255              | 12.261 | 12.255 | 12.259 | 12.260 | 12.259 | 12.258    | 0.022 |
| S7        | 12.451              | 12.452 | 12.450 | 12.453 | 12.454 | 12.455 | 12.453    | 0.016 |
| S8        | 12.861              | 12.867 | 12.860 | 12.866 | 12.870 | 12.867 | 12.865    | 0.029 |
| S9        | 13.221              | 13.221 | 13.220 | 13.222 | 13.223 | 13.223 | 13.222    | 0.008 |
| S10       | 13.956              | 13.955 | 13.954 | 13.959 | 13.956 | 13.957 | 13.956    | 0.013 |
| S11       | 14.482              | 14.484 | 14.483 | 14.479 | 14.483 | 14.481 | 14.482    | 0.012 |

RSD, relative standard deviation.

Table SII. Results of the precision analysis of the instrument (intensity).

| Peak name | Intensity, counts per sec |          |          |          |          |          | Mean     | % RSD |
|-----------|---------------------------|----------|----------|----------|----------|----------|----------|-------|
|           | 1                         | 2        | 3        | 4        | 5        | 6        |          |       |
| S1        | 32228.1                   | 32856.1  | 33537.3  | 33190.6  | 31364.7  | 38069.6  | 33541.1  | 7.000 |
| S2        | 58552.8                   | 54558.6  | 55847.1  | 53468.2  | 54998.5  | 65344.3  | 57128.2  | 7.658 |
| S3        | 130624.8                  | 149033.8 | 132065.4 | 133668.2 | 133072.2 | 130147.9 | 134768.7 | 5.283 |
| S4        | 566037.3                  | 503198.8 | 519923.9 | 523825.9 | 509432.1 | 519010.4 | 523571.4 | 4.230 |
| S5        | 138161.8                  | 152078.2 | 156990.2 | 161438.5 | 150562.4 | 167058.5 | 154381.6 | 6.479 |
| S6        | 589463.6                  | 570000.4 | 564297.5 | 634577.8 | 585366.4 | 526944.0 | 578441.6 | 6.109 |
| S7        | 187075.7                  | 188730.9 | 181997.6 | 196783.8 | 189871.3 | 180183.0 | 187440.4 | 3.177 |
| S8        | 73978.0                   | 69358.2  | 68168.6  | 74703.6  | 69776.9  | 69120.8  | 70851.0  | 3.901 |
| S9        | 310312.7                  | 301192.0 | 289606.0 | 302301.8 | 263634.1 | 285055.9 | 292017.1 | 5.699 |
| S10       | 61673.5                   | 68952.5  | 68250.9  | 60942.3  | 61613.6  | 60957.6  | 63731.7  | 5.949 |
| S11       | 381781.6                  | 423654.4 | 412149.6 | 393056.8 | 399326.4 | 436527.3 | 407749.3 | 4.980 |

RSD, relative standard deviation.

Table SIII. Results of the sample stability analysis (retention time).

| Peak name | Retention time, min |        |        |        |        |        | Mean, min | % RSD |
|-----------|---------------------|--------|--------|--------|--------|--------|-----------|-------|
|           | 0 h                 | 2 h    | 4 h    | 8 h    | 12 h   | 24 h   |           |       |
| S1        | 1.980               | 1.975  | 1.969  | 1.982  | 1.983  | 1.981  | 1.978     | 0.281 |
| S2        | 8.230               | 8.230  | 8.234  | 8.232  | 8.231  | 8.222  | 8.230     | 0.049 |
| S3        | 11.484              | 11.491 | 11.496 | 11.494 | 11.492 | 11.493 | 11.492    | 0.035 |
| S4        | 11.716              | 11.721 | 11.724 | 11.713 | 11.712 | 11.708 | 11.716    | 0.051 |
| S5        | 12.008              | 12.017 | 12.015 | 12.012 | 12.007 | 12.013 | 12.012    | 0.032 |
| S6        | 12.255              | 12.260 | 12.261 | 12.260 | 12.241 | 12.249 | 12.254    | 0.065 |
| S7        | 12.451              | 12.454 | 12.456 | 12.450 | 12.451 | 12.445 | 12.451    | 0.031 |
| S8        | 12.861              | 12.870 | 12.866 | 12.865 | 12.861 | 12.862 | 12.864    | 0.027 |
| S9        | 13.221              | 13.223 | 13.222 | 13.220 | 13.220 | 13.213 | 13.220    | 0.028 |
| S10       | 13.956              | 13.956 | 13.956 | 13.956 | 13.959 | 13.952 | 13.956    | 0.018 |
| S11       | 14.482              | 14.483 | 14.482 | 14.482 | 14.483 | 14.484 | 14.483    | 0.004 |

RSD, relative standard deviation.

Table SIV. Result of the sample stability analysis (intensity).

| Peak name | Intensity, counts per sec |          |          |          |          |          | Mean     | % RSD |
|-----------|---------------------------|----------|----------|----------|----------|----------|----------|-------|
|           | 0 h                       | 2 h      | 4 h      | 8 h      | 12 h     | 24 h     |          |       |
| S1        | 32228.1                   | 31364.7  | 29133.3  | 30138.1  | 30828.3  | 29654.8  | 30557.9  | 3.741 |
| S2        | 257880.7                  | 240274.9 | 217965.6 | 238923.3 | 258552.8 | 261895.5 | 245915.5 | 6.853 |
| S3        | 130624.8                  | 133072.2 | 120553.7 | 121890.5 | 122462.3 | 121283.3 | 124981.1 | 4.331 |
| S4        | 566037.3                  | 509432.1 | 500257.8 | 502631.3 | 513912.9 | 515689.0 | 517993.4 | 4.692 |
| S5        | 138161.8                  | 150562.4 | 145973.7 | 142638.5 | 147837.5 | 142495.1 | 144611.5 | 3.056 |
| S6        | 589463.6                  | 585366.4 | 586339.0 | 576251.9 | 583310.9 | 571178.5 | 581985.1 | 1.185 |
| S7        | 187075.7                  | 189871.3 | 190653.8 | 187230.5 | 178045.0 | 187590.8 | 186744.5 | 2.416 |
| S8        | 73978.0                   | 69776.9  | 70959.3  | 70253.8  | 70053.3  | 70319.3  | 70890.1  | 2.204 |
| S9        | 310312.7                  | 263634.1 | 276403.3 | 271835.0 | 273641.4 | 271085.4 | 277818.6 | 5.931 |
| S10       | 61673.5                   | 61613.6  | 75017.8  | 73918.6  | 73092.4  | 70725.8  | 69340.3  | 8.836 |
| S11       | 381781.6                  | 399326.4 | 412071.9 | 410374.7 | 402618.3 | 408614.3 | 402464.5 | 2.790 |

RSD, relative standard deviation.

Table SV. Receiver operating characteristic analysis results of 27 biomarkers and the combined model.

| Type                           | Metabolite                          | AUC                      | Standard error | 95% CI |       | Sensitivity | Specificity |
|--------------------------------|-------------------------------------|--------------------------|----------------|--------|-------|-------------|-------------|
|                                |                                     |                          |                | Lower  | Upper |             |             |
| Phospholipids                  | Phosphorylcholine <sup>a</sup>      | 0.913                    | 0.035          | 0.843  | 0.982 | 0.854       | 1.000       |
|                                | LysoPE (20:0/0:0)                   | 0.864                    | 0.051          | 0.764  | 0.965 | 0.875       | 0.714       |
|                                | LysoPC (14:0)                       | 0.837                    | 0.054          | 0.731  | 0.944 | 0.813       | 0.762       |
|                                | LysoPE (0:0/20:0)                   | 0.832                    | 0.052          | 0.730  | 0.934 | 0.688       | 0.952       |
|                                | LysoPE [18:2(9Z,12Z)/0:0]           | 0.829                    | 0.059          | 0.713  | 0.946 | 0.854       | 0.762       |
|                                | PC [14:1(9Z)/18:1(9Z)]              | 0.814                    | 0.055          | 0.707  | 0.922 | 0.771       | 0.714       |
|                                | LysoPC (16:1(9Z))                   | 0.788                    | 0.067          | 0.657  | 0.919 | 0.875       | 0.667       |
|                                | LysoPE (18:0/0:0)                   | 0.759                    | 0.072          | 0.617  | 0.901 | 0.896       | 0.619       |
|                                | LysoPC (15:0)                       | 0.744                    | 0.061          | 0.625  | 0.863 | 0.563       | 0.857       |
|                                | Glucosylsphingosine                 | 0.743                    | 0.076          | 0.595  | 0.891 | 0.833       | 0.667       |
|                                | PC (13:0/0:0)                       | 0.732                    | 0.062          | 0.611  | 0.853 | 0.563       | 0.810       |
|                                | LysoPE (16:0/0:0)                   | 0.731                    | 0.062          | 0.610  | 0.852 | 0.729       | 0.714       |
|                                | LysoPC (18:1(9Z))                   | 0.715                    | 0.080          | 0.559  | 0.871 | 0.938       | 0.571       |
|                                | Amino acids                         | N-Acetyl-L-aspartic acid | 0.842          | 0.053  | 0.738 | 0.946       | 0.708       |
| L-Acetylcarnitine <sup>a</sup> |                                     | 0.803                    | 0.054          | 0.698  | 0.907 | 0.762       | 0.708       |
| Decanoylcarnitine              |                                     | 0.840                    | 0.056          | 0.730  | 0.950 | 0.792       | 0.905       |
| L-Tryptophan                   |                                     | 0.793                    | 0.066          | 0.664  | 0.921 | 0.771       | 0.762       |
| Selenohomocysteine             |                                     | 0.737                    | 0.064          | 0.613  | 0.862 | 0.714       | 0.708       |
| Unsaturated fatty acids        | L-Valine                            | 0.731                    | 0.064          | 0.606  | 0.856 | 0.667       | 0.750       |
|                                | Arachidonic acid <sup>a</sup>       | 0.887                    | 0.050          | 0.789  | 0.985 | 0.905       | 0.833       |
|                                | Eicosapentaenoic acid               | 0.870                    | 0.048          | 0.775  | 0.965 | 0.857       | 0.875       |
|                                | Linoleic acid                       | 0.779                    | 0.063          | 0.656  | 0.902 | 0.714       | 0.812       |
|                                | Oleic acid                          | 0.774                    | 0.069          | 0.640  | 0.908 | 0.524       | 0.937       |
|                                | Palmitic acid                       | 0.722                    | 0.072          | 0.581  | 0.863 | 0.524       | 0.975       |
| Cholic acids                   | Glycocholic acid <sup>a</sup>       | 0.808                    | 0.056          | 0.697  | 0.918 | 0.729       | 0.810       |
|                                | Cholic acid                         | 0.768                    | 0.058          | 0.654  | 0.882 | 0.750       | 0.667       |
|                                | Glycoursodeoxycholic acid           | 0.768                    | 0.057          | 0.656  | 0.880 | 0.500       | 0.952       |
| Combined indicator             | Four metabolites model <sup>a</sup> | 0.990                    | 0.008          | 0.000  | 1.000 | 0.979       | 0.952       |

<sup>a</sup>The four metabolites model comprised phosphorylcholine, L-acetylcarnitine, arachidonic acid and glycocholic acid. CI, confidence interval; AUC, area under the curve; PC, phosphatidylcholine; LysoPC, lysophosphatidylcholine; LysoPE, lysophosphatidylethanolamine.
